# Supplementary material
Source: Elsevier journal article supplement (https://www.sciencedirect.com/science/article/pii/S2174204921002087)
Supplement: mmc1 [file S2174204921002087:mmc1.docx]

**Table 2**

Massimo Chello, Giuseppe Patti, Dario Candura, et al. Effects of atorvastatin on systemic inflammatory response after coronary bypass surgery. Crit Care Med. 2006 Mar;34(3):660-7.

Patti, G.; Chello, M.; Candura, D.; Pasceri, V.; D’Ambrosio, A.; Covino, E.; Di Sciascio, G. Randomized Trial of Atorvastatin for Reduction of Postoperative Atrial Fibrillation in Patients Undergoing Cardiac Surgery. Circulation 2006, 114, 1455–1461.

Mannacio VA, Iorio D, De Amicis V, Di Lello F, Musumeci F. Effect of rosuvastatin pretreatment on myocardial damage after coronary surgery: a randomized trial, J Thorac Cardiovasc Surg, 2008, vol. 136 (pg. 1541-8)

Song YB, On YK, Kim JH, Shin DH, Kim JS, Sung J, et al. The effects of atorvastatin on the occurrence of postoperative atrial fibrillation after off-pump coronary artery bypass grafting surgery, Am Heart J, 2008, vol. 156 pg. 373 . e9–16

Ji Q, Mei Y, Wang X, Sun Y, Feng J, Cai J, et al. Effect of preoperative atorvastatin therapy on atrial fibrillation following off-pump coronary artery bypass grafting, Circ J, 2009, vol. 73 (pg. 2244-9)

Kourliouros A, Valencia O, Hosseini MT, Mayr M, Sarsam M, Camm J, Jahangiri M. Preoperative high-dose atorvastatin for prevention of atrial fibrillation after cardiac surgery: a randomized controlled trial. J Thorac Cardiovasc Surg. 2011;141:244–248

Sun Y, Ji Q, Mei Y, Wang X, Feng J, Cai J, Chi L. Role of preoperative atorvastatin administration in protection against postoperative atrial fibrillation following conventional coronary artery bypass grafting. Int Heart J. 2011;52:7–11

Vukovic PM, Maravic-Stojkovic VR, Peric MS, et al. Steroids and statins: an old and a new anti-inflammatory strategy compared. Perfusion 2011;26:31–7.

Mohammed Ahmed Saad Almansob, Bo Xu, Li Zhou, et al. Simvastatin reduces myocardial injury undergoing noncoronary artery cardiac surgery: a randomized controlled trial. Arterioscler Thromb Vasc Biol. 2012 Sep;32(9):2304-13.

Baran C, Durdu S, Dalva K, Zaim C, Dogan A, Ocakoglu G, Gurman G, Arslan O, Akar AR. Effects of preoperative short term use of atorvastatin on endothelial progenitor cells after coronary surgery: a randomized, controlled trial. Stem Cell Rev. 2012;8:963–971

Mohammad Reza Dehghani, Majid Kasianzadeh, Yousef Rezaei, et al. Atorvastatin Reduces the Incidence of Postoperative Atrial Fibrillation in Statin-Naive Patients Undergoing Isolated Heart Valve Surgery: A Double-Blind, Placebo-Controlled Randomized Trial. J Cardiovasc Pharmacol Ther. 2015 Sep;20(5):465-72.

Aydin U, Yilmaz M, Duzyol C, Ata Y, Turk T, Orhan AL et al. Efficiency of postoperative statin treatment for preventing new onset postoperative atrial fibrillation in patients undergoing isolated coronary artery bypass grafting: a prospective randomized study. Anadolu Kardiyol Derg 2014; doi: 10.5152/akd.2014.5531.

Jin Ha Park, Jae-Kwang Shim, Jong-Wook Song, et al. Effect of atorvastatin on the incidence of acute kidney injury following valvular heart surgery: a randomized, placebo-controlled trial. Intensive Care Med. 2016 Sep;42(9):1398-407.

Yolanda Carrascal, Roman J Arnold, Luis De la Fuente, et al. Efficacy of atorvastatin in prevention of atrial fibrillation after heart valve surgery in the PROFACE trial (PROphylaxis of postoperative atrial Fibrillation After Cardiac surgEry). J Arrhythm. 2016 Jun;32(3):191-7.

Frederic T. Billings, Patricia A. Hendricks, Jonathan S. Schildcrout, et al. High-dose perioperative atorvastatin and acute kidney injury following cardiac surgery: a randomized clinical trial. JAMA. 2016 Mar 1; 315(9): 877–888.

Zhe Zheng, Raja Jayaram, Lixin Jiang, et al. Perioperative Rosuvastatin in Cardiac Surgery. N Engl J Med 2016; 374:1744-1753

Table 3

Tveit A, Grundtvig M, Gundersen T, Vanberg P, Semb AG, Holt E, Gullestad L. Analysis of pravastatin to prevent recurrence of atrial fibrillation after electrical cardioversion. Am J Cardiol. 2004;93(6):780–782

Ozaydin M, Varol E, Aslan SM, Kucuktepe Z, Dogan A, Ozturk M, Altinbas A. Effect of atorvastatin on the recurrence rates of atrial fibrillation after electrical cardioversion. Am J Cardiol. 2006;97(10):1490–1493

Almroth H, Hoglund N, Boman K, Englund A, Jensen S, Kjellman B, Tornvall P, Rosenqvist M. Atorvastatin and persistent atrial fibrillation following cardioversion: a randomized placebo-controlled multicentre study. Eur Heart J. 2009;30(7):827–833

Xia W, Yin Z, Li J, Song Y, Qu X. Effects of rosuvastatin on asymmetric dimethylarginine levels and early atrial fibrillation recurrence after electrical cardioversion. Pacing Clin Electrophysiol. 2009;32(12):1562–1566

Demir K, Can I, Koc F, Vatankulu MA, Ayhan S, Akilli H, Aribas A, Alihanoglu Y, Altunkeser BB. Atorvastatin given prior to electrical cardioversion does not affect the recurrence of atrial fibrillation in patients with persistent atrial fibrillation who are on antiarrhythmic therapy. Med Princ Pract. 2011;20(5):464–469

Negi S, Shukrullah I, Veledar E, Bloom HL, Jones DP, Dudley SC. Statin therapy for the prevention of atrial fibrillation trial (SToP AF trial) J Cardiovasc Electrophysiol. 2011;22(4):414–419
